# Supplementary material for: Treadmill Exercise Reduces Neuroinflammation, Glial Cell Activation and Improves Synaptic Transmission in the Prefrontal Cortex in 3 × Tg-AD Mice
Source: MDPI journal article supplement (doi:10.3390/ijms232012655), 2022-10-21
Supplement: s1 [file s1]

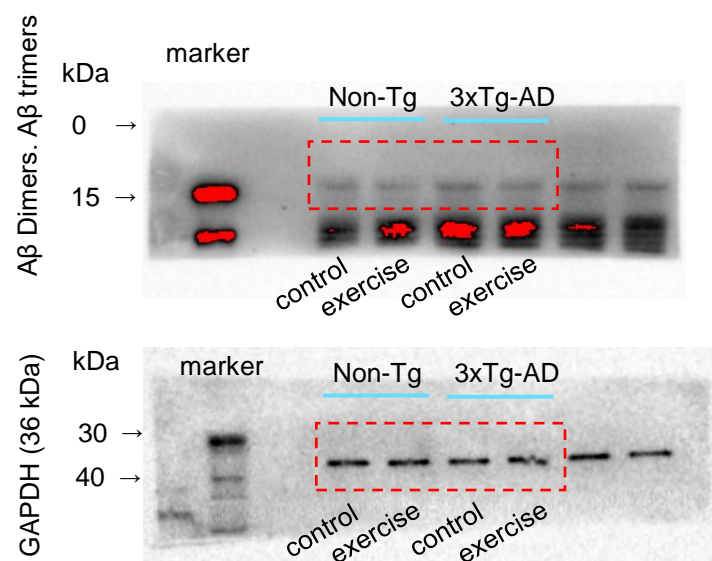

**Supplementary Figure S1. Full-length Western blots of the A $\beta$  Dimers and A $\beta$  Trimers expression data shown in Figure 1. Red boxes indicate the bands that were cropped for the representative images shown in Figure 1.**

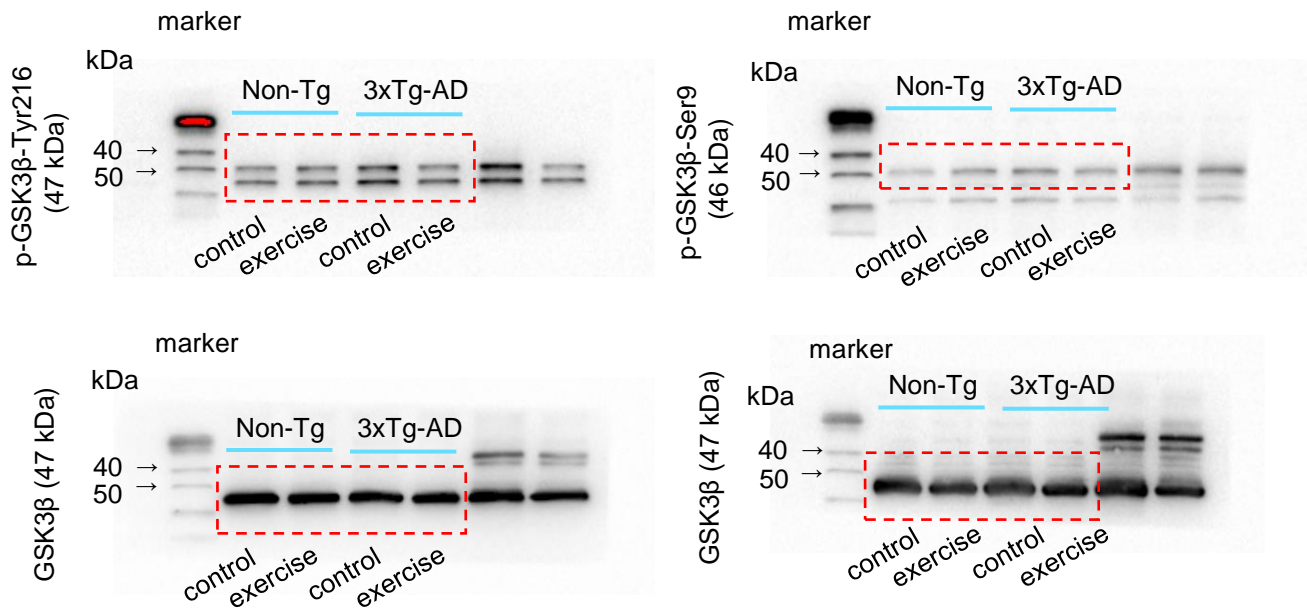

**Supplementary Figure S2. Full-length Western blots of the GSK3β, p-GSK3β-Tyr216 and p-GSK3β-Ser9 expression data shown in Figure 2. Red boxes indicate the bands that were cropped for the representative images shown in Figure 2.**

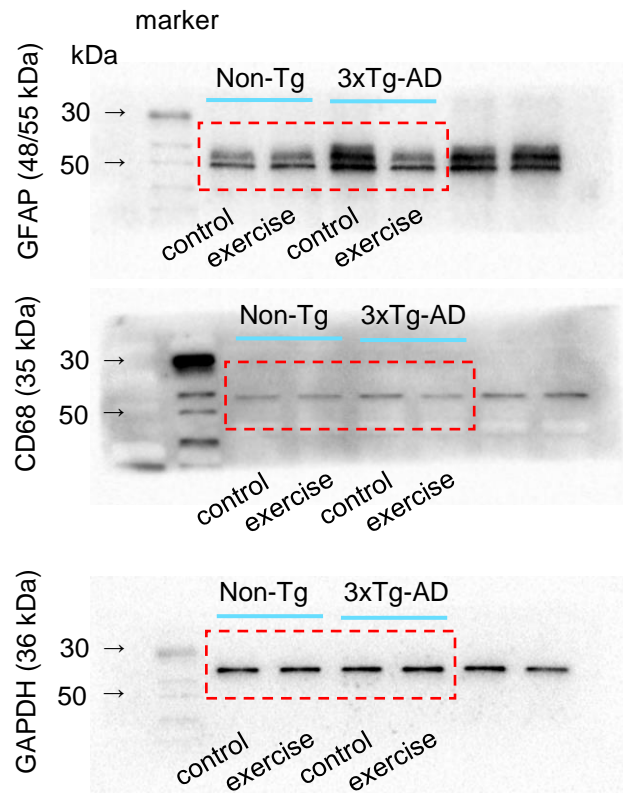

**Supplementary Figure S3. Full-length Western blots of the GFAP and CD68 expression data shown in Figure 3.** Red boxes indicate the bands that were cropped for the representative images shown in Figure 3.

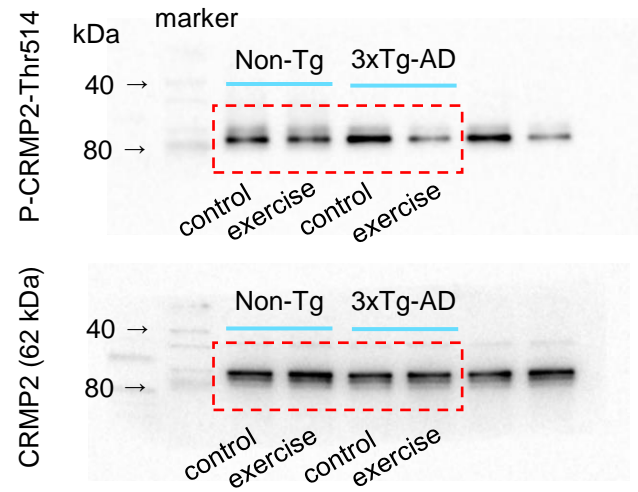

**Supplementary Figure S4. Full-length Western blots of the CRMP2 and p-CRMP2-Thr514 expression data shown in Figure 4.** Red boxes indicate the bands that were cropped for the representative images shown in Figure 4.
